# Supplementary material for: Risk of psoriatic arthritis depending on age: analysis of data from 65 million people on statutory insurance in Germany
Source: PubMed Central journal article supplement — RMD Open. 2021 Dec 3;7(3):e001975. doi: 10.1136/rmdopen-2021-001975 (PMC8647537; doi:10.1136/rmdopen-2021-001975), 2021-12-03
Supplement: rmdopen-2021-001975supp001.pdf [file rmdopen-2021-001975supp001.pdf]

| Age (years) | Men (2009) | Women (2009) | Men (2010) | Women (2010) | Men (2011) | Women (2011) |
|-------------|------------|--------------|------------|--------------|------------|--------------|
| 0 - 24      | 1,82       | 2,67         | 1,89       | 2,79         | 1,97       | 2,90         |
| 25 - 29     | 8,48       | 9,00         | 8,81       | 9,38         | 9,15       | 9,78         |
| 30 - 34     | 12,80      | 12,92        | 13,31      | 13,50        | 13,85      | 14,11        |
| 35 - 39     | 17,89      | 18,02        | 18,68      | 18,89        | 19,52      | 19,81        |
| 40 - 44     | 22,82      | 24,30        | 24,01      | 25,61        | 25,25      | 27,00        |
| 45 - 49     | 26,69      | 31,05        | 28,31      | 32,94        | 30,03      | 34,95        |
| 50 - 54     | 28,35      | 35,84        | 30,30      | 38,28        | 32,38      | 40,89        |
| 55 - 59     | 28,07      | 36,55        | 30,12      | 39,28        | 32,31      | 42,21        |
| 60 - 64     | 25,43      | 31,29        | 27,23      | 33,78        | 29,16      | 36,46        |
| 65 - 69     | 21,53      | 22,86        | 22,88      | 24,73        | 24,32      | 26,75        |
| 70 - 74     | 14,03      | 13,32        | 14,78      | 14,47        | 15,58      | 15,72        |
| 75 - 79     | 10,80      | 8,53         | 11,23      | 9,24         | 11,67      | 10,02        |
| > 80        | 9,28       | 5,78         | 9,49       | 6,20         | 9,70       | 6,65         |

Tab. 1: Age- and sex-specific incidence of PsA (per 100,000 py) in Germany between 2009 and 2011
